# Supplementary material for: The impact of high dose oral cotrimoxazole in patients with COVID-19 with hypoxic respiratory failure requiring non-invasive ventilation: A Case Control Study
Source: bioRxiv or medRxiv preprint supplement (doi:10.1101/2021.01.14.21249803), 2021-01-15
Supplement: Supplementary file [file media-1.pdf]

**SUPPLEMENTARY TABLE**

**Table S1: Cox regression survival analysis for the whole cohort, CTX+ST and ST only groups**

| Whole cohort  |              | Univariate analysis |             |         | Multivariate analysis |               |         |
|---------------|--------------|---------------------|-------------|---------|-----------------------|---------------|---------|
| Covariates    |              | HR                  | 95% CI      | p-value | HR                    | 95% CI        | p-value |
| Age           |              | 1.02                | 0.99-1.05   | 0.109   |                       |               |         |
| DM            | Ref = absent | 2.09                | 1.03-4.26   | 0.042   |                       |               |         |
| Asthma        | Ref = absent | 4.32                | 0.59-31.71  | 0.150   |                       |               |         |
| CKD           | Ref = absent | 8.10                | 2.49-26.42  | 0.001   | 6.29                  | 1.32-29.93    | 0.021   |
| CAD           | Ref = absent | 2.08                | 0.74-5.89   | 0.166   |                       |               |         |
| BMI           |              | 0.88                | 0.75-1.04   | 0.136   |                       |               |         |
| CRP day 0     |              | 1.02                | 1.009-1.03  | <0.001  |                       |               |         |
| CXR/CT        |              | 9.19                | 3.08-27.44  | <0.001  |                       |               |         |
| NLR day 0     |              | 1.032               | 0.99-1.07   | 0.064   |                       |               |         |
| R/R           |              | 1.19                | 1,12-1.29   | <0.001  | 1.19                  | 1.08-1.31     | 0.001   |
| Temp          |              | 1.28                | 1.01-1.63   | 0.041   |                       |               |         |
| CTX+ST group  |              | Univariate analysis |             |         | Multivariate analysis |               |         |
| Covariates    |              | HR                  | 95% CI      | p-value | HR                    | 95% CI        | p-value |
| Age           |              | 1.06                | 1.02-1.11   | 0.009   | 1.09                  | 1.01-1.185    | 0.027   |
| DM            | Ref = absent | 2.41                | 0.91-6.39   | 0.078   |                       |               |         |
| Asthma        | Ref = absent | 7.64                | 1.01-57.88  | 0.049   | 562.67                | 8.01-39509.33 | 0.004   |
| CKD           | Ref = absent | 24.56               | 2.41-250.42 | 0.007   |                       |               |         |
| CAD           | Ref = absent | 2.93                | 0.82-10.38  | 0.095   |                       |               |         |
| CRP at day 0  |              | 1.03                | 1.01-1.04   | 0.001   |                       |               |         |
| NLR at day 0  |              | 1.05                | 1.01-1.09   | 0.022   |                       |               |         |
| R/R           |              | 1.34                | 1.19-1.50   | <0.001  | 1.37                  | 1.16-1.63     | <0.001  |
| ST only group |              | Univariate analysis |             |         | Multivariate analysis |               |         |
| Covariates    |              | HR                  | 95% CI      | p-value | HR                    | 95% CI        | p-value |
| Male sex      | Ref = absent | 2.29                | 0.66-7.95   | 0.191   |                       |               |         |
| Age           |              | 0.96                | 0.91-1.01   | 0.132   |                       |               |         |
| CRP at day 0  |              | 1.02                | 0.99-1.04   | 0.088   |                       |               |         |
| CXR/CT        |              | 12.73               | 2.99-54.17  | 0.001   |                       |               |         |
| R/R           |              | 1.20                | 1.02-1.41   | 0.028   |                       |               |         |
| Temp          |              | 2.61                | 1.43-4.77   | 0.002   | 2.68                  | 1.09-6.54     | 0.031   |

Definition of abbreviations: SD = Standard Deviation; CTX = Cotrimoxazole; ST = Standard Therapy; HR = Hazard Ratio; CI = Confidence Interval; DM = Diabetes Mellitus; CKD = Chronic Kidney Disease; CAD = Coronary Artery Disease; BMI = Body Mass Index; CRP = C-reactive protein; NLR = Neutrophil-Lymphocyte ratio; CXR = Chest x-ray; R/R = Respiratory rate; Temp = Temperature
